# Supplementary material for: Examining the Variations in Undergraduate Students’ Conceptions of Successful Researchers: A Phenomenographic Study
Source: Atypon-hosted journal article supplement (doi:10.1187/cbe.21-10-0295), 2022-08-04
Supplement: combinedsupmats.pdf [file combinedsupmats.pdf]

# Supplemental Material

*CBE—Life Sciences Education*

Zuckerman and Lo

# **Examining the Variations in Undergraduate Students' Conceptions of Successful Researchers: A Phenomenographic Study**

## Supplemental Material

Austin L. Zuckerman<sup>1,2,3</sup>, Stanley M. Lo<sup>1,2\*</sup>

<sup>1</sup>Department of Cell and Developmental Biology, School of Biological Sciences and

<sup>2</sup>Program in Mathematics and Science Education, University of California San Diego

<sup>3</sup>Program in Mathematics and Science Education, San Diego State University

\*Corresponding author:

Stanley M. Lo

9500 Gilman Drive #0355

La Jolla, CA 92093-0355

Email: [smlo@ucsd.edu](mailto:smlo@ucsd.edu)

Phone: (858) 246-1087

**Table S1. Summary of phenomenographic terminology.** Phenomenography is a research approach that examines how individuals think, interpret, or experience a phenomenon of interest. Conceptual terms describe the units or products resulting from a phenomenographic study; methodological terms describe analytical approaches and validity measures in phenomenography. Examples or applications of how each term was operationalized in this study are provided.

| Dimension      | Term                    | Definition                                                                                                                                                                                                           | Example(s) in this Study                                                                                                                                                                      |
|----------------|-------------------------|----------------------------------------------------------------------------------------------------------------------------------------------------------------------------------------------------------------------|-----------------------------------------------------------------------------------------------------------------------------------------------------------------------------------------------|
| Conceptual     | Aspect                  | Features of the phenomenon that individuals attend to                                                                                                                                                                | Process: How researchers approach their work                                                                                                                                                  |
|                | Variation               | Differences within each aspect that articulate how different individuals conceptualize the same phenomenon                                                                                                           | For a researcher's process, Conception II is distinct from Conception I by shifting the focus from the end product to the process                                                             |
|                | Conception              | Units of description in phenomenographic research that collectively describe the way that a phenomenon can be understood                                                                                             | Conception I describes a coherent disconnection of the researcher from all three aspects of process, interactions, and contributions                                                          |
|                | Outcome space           | Holistic set of different conceptions of the phenomenon that are distinguished by variations in different aspects of the phenomenon that individuals attend to                                                       | Table 2 describing the three conceptions and variations across the aspects                                                                                                                    |
| Methodological | Contextualized approach | Analytical approach in which data are treated as individual units of analysis, e.g. individual interview transcripts being treated as units of holistically inter-related meanings that can be related to on another | Each transcript was coded as representing one of the three conceptions by identifying aspect(s) and assigning the conception that described the variation of that aspect in the outcome space |
|                | De-contextualized       | Analytical approach in which                                                                                                                                                                                         | Each interview response was treated                                                                                                                                                           |

|  |                        |                                                                                                                                |                                                                                                                                                                                                                           |
|--|------------------------|--------------------------------------------------------------------------------------------------------------------------------|---------------------------------------------------------------------------------------------------------------------------------------------------------------------------------------------------------------------------|
|  | approach               | segments of interview transcripts are combined into one pool of analysis to interpret data within the larger interview context | as an isolated segment. These isolated responses were pooled together and interpreted independently of the whole interview transcripts                                                                                    |
|  | Communicative validity | Methods and findings are judged to be defensible and persuasive by relevant research communities                               | Aspects, variations, and outcome spaces were presented to different communities of STEM and education researchers to verify that the claims were grounded in the findings                                                 |
|  | Pragmatic validity     | Findings are useful and meaningful for providing practical insights into teaching and learning                                 | Implications for mentorship approaches and research professional development activities as informed by the outcome space; Description of how outcome space can be used in future work to map student trajectories in UREs |
